# Supplementary material for: Treatment of lower urinary tract symptoms in men in primary care using a conservative intervention: cluster randomised controlled trial
Source: PubMed Central journal article supplement (PMC10646682; doi:10.1136/bmj-2023-075219), 2023-11-15
Supplement: dram075219.wt1.pdf [file dram075219.wt1.pdf]

## SUPPLEMENTARY TABLES

**Table S1: Sensitivity analysis: Comparison of the results of ITT analysis with per protocol analyses**

|                                                                                                                                                                                                                                                                                                           | N (int)<br>* | N<br>(usual<br>care)* | Total | Mean  | SD   | Min -<br>Max | Difference in<br>means<br>95% CI | p-value |
|-----------------------------------------------------------------------------------------------------------------------------------------------------------------------------------------------------------------------------------------------------------------------------------------------------------|--------------|-----------------------|-------|-------|------|--------------|----------------------------------|---------|
| <b>ITT</b>                                                                                                                                                                                                                                                                                                | 424          | 463                   | 887   | 12.79 | 6.64 | 0 - 35       | -1.81<br>(-2.66, -0.95)          | <0.001  |
| <b>Per protocol 1:</b> Including all in the usual care arm and those in the intervention who received the intervention booklet and had 3 follow-up contacts                                                                                                                                               | 391          | 463                   | 854   | 12.84 | 6.67 | 0 - 35       | -1.84<br>(-2.70, -0.99)          | <0.001  |
| <b>Per protocol 2:</b> Including all in the usual care arm and those in the intervention who received the intervention booklet and had 2 follow-up contacts                                                                                                                                               | 24           | 463                   | 487   | 13.76 | 6.80 | 0 - 32       | -0.83<br>(-3.16, 1.50)           | 0.485   |
| <b>Per protocol 3:</b> Including all in the usual care arm and those in the intervention who received the intervention booklet and had 1 follow-up contact                                                                                                                                                | 5            | 463                   | 468   | 13.88 | 6.85 | 0 - 32       | -0.57<br>(-5.12, 3.99)           | 0.807   |
| <b>Per protocol 4:</b> Including all in the usual care arm and those in the intervention who received the intervention booklet and had no follow-up contacts                                                                                                                                              | 2            | 463                   | 465   | 13.90 | 6.83 | 0 - 32       | -4.25<br>(-11.38, 2.89)          | 0.244   |
| <b>Per protocol 5:</b> Including all in the usual care arm and those in the intervention who received the intervention in the protocolised format (all 3 follow-ups, week 1 was delivered on the phone and week 4 or 12 delivered in the participants preferred follow-up method (not done face-to-face)) | 344          | 463                   | 807   | 12.83 | 6.63 | 0-35         | -2.06<br>(-2.92, -1.20)          | <0.001  |

\*Ns included in analysis (dependent on completion of IPSS at baseline and 12 month follow-up)

**Table S2: Reasons for exclusion at GP manual screening**

| <b>Reason for exclusion</b>                                   | <b>Patients excluded at<br/>GP manual screening;<br/>n (% of all exclusions)</b> |
|---------------------------------------------------------------|----------------------------------------------------------------------------------|
| <i>Currently being treated for prostate or bladder cancer</i> | 50 (2.4)                                                                         |
| <i>Lack of capacity</i>                                       | 85 (4.2)                                                                         |
| <i>Patient does not have LUTS</i>                             | 871 (42.6)                                                                       |
| <i>Patient is under 18 years of age</i>                       | 4 (0.2)                                                                          |
| <i>Patient has poorly-controlled diabetes mellitus</i>        | 18 (0.9)                                                                         |

|                                                               |            |
|---------------------------------------------------------------|------------|
| <i>Previous prostate surgery</i>                              | 71 (3.5)   |
| <i>Recently referred or currently under urological review</i> | 441 (21.5) |
| <i>Relevant neurological disease or referral</i>              | 56 (2.7)   |
| <i>Unable to complete assessments in English</i>              | 9 (0.4)    |
| <i>Unable to pass urine without a catheter</i>                | 61 (3.0)   |
| <i>Undergoing urological testing for LUTS</i>                 | 38 (1.9)   |
| <i>Visible haematuria</i>                                     | 42 (2.1)   |
| <i>Other*</i>                                                 | 301 (14.7) |
|                                                               | 2,047      |

*\*Other: Awaiting surgery or had previous surgery (n=2), COPD (n=3), cancer (n=17), cognitive impairment (n=14), deceased (n=4), declined research (n=6), declined treatment for LUTS (n=4), under palliative care (n=6), family bereavement/illness (n=6), frail (n=39), housebound (n=19), may not be able to comply with follow-up (n=2), mental health or substance use issues (n=29), no symptoms (n=13), not living at home (n=17), no longer at practice (n=13), involved in another trial (n=50), permanent catheter (n=1), prostatitis (n=3), UTI (n=6), under bladder/bowel services (n=1), reason not given (n=9) and other (n=37).*



**Table S3 Serious Adverse Events (identified through trial SAE reporting procedures)**

|                                                | Received Intervention | Received Usual care | Overall |
|------------------------------------------------|-----------------------|---------------------|---------|
| <b><i>Adverse events</i></b>                   |                       |                     |         |
| Total number of SAEs; n                        | 47                    | 47                  | 94      |
| Total number of related AEs; n                 | 0                     | 0                   | 0       |
| Total number of deaths; n                      | 2                     | 1                   | 3       |
| <b><i>Status of SAEs; n(%)<sup>a</sup></i></b> |                       |                     |         |
| Resolved                                       | 45 (95.74%)           | 44 (93.62%)         | 89      |
| Ongoing                                        | 0                     | 2 (4.26%)           | 2       |
| Died                                           | 2 (4.26%)             | 1 (2.13%)           | 3       |

<sup>a</sup> Denominator for the proportion is the total number of SAEs in treatment arm
