# Supplementary material for: Treatment of lower urinary tract symptoms in men in primary care using a conservative intervention: cluster randomised controlled trial
Source: PubMed Central journal article supplement (PMC10646682; doi:10.1136/bmj-2023-075219), 2023-11-15
Supplement: dram075219.ww1.pdf [file dram075219.ww1.pdf]

| Questionnaire/bladder diary scores |                                          | Drinks and water intake                     | Controlling bladder leakage                 | Controlling urgent need to urinate          | Emptying bladder completely                 | Getting rid of the last drops | Reducing sleep disturbance                  | GP consultation              |
|------------------------------------|------------------------------------------|---------------------------------------------|---------------------------------------------|---------------------------------------------|---------------------------------------------|-------------------------------|---------------------------------------------|------------------------------|
| IPSS                               | Q1 score<br><i>Incomplete emptying</i>   |                                             |                                             |                                             | Score of 3 or more <input type="checkbox"/> |                               |                                             |                              |
|                                    | Q2 score<br><i>Frequency</i>             | Score of 3 or more <input type="checkbox"/> |                                             |                                             |                                             |                               |                                             |                              |
|                                    | Q4 score<br><i>Urgency</i>               |                                             |                                             | Score of 3 or more <input type="checkbox"/> |                                             |                               |                                             |                              |
|                                    | Q7 score<br><i>Nocturia</i>              | Score of 1 or more <input type="checkbox"/> |                                             |                                             |                                             |                               | Score of 1 or more <input type="checkbox"/> |                              |
| ICIQ UI SF                         | Q1 score<br><i>How often leak</i>        |                                             | Score of 1 or more <input type="checkbox"/> |                                             |                                             |                               |                                             |                              |
|                                    | Q4 part 2<br><i>Leak before toilet</i>   |                                             |                                             | Yes <input type="checkbox"/>                |                                             |                               |                                             |                              |
|                                    | Q4 part 3<br><i>Leak cough/sneeze</i>    |                                             | Yes <input type="checkbox"/>                |                                             |                                             |                               |                                             |                              |
|                                    | Q4 part 4<br><i>Leak asleep</i>          |                                             |                                             |                                             |                                             |                               |                                             | Yes <input type="checkbox"/> |
|                                    | Q4 part 5<br><i>Leak active</i>          |                                             | Yes <input type="checkbox"/>                |                                             |                                             |                               |                                             |                              |
|                                    | Q4 part 6<br><i>Leak after urinating</i> |                                             |                                             |                                             |                                             | Yes <input type="checkbox"/>  |                                             |                              |
|                                    | Q4 part 7<br><i>Leak no reason</i>       |                                             |                                             |                                             |                                             |                               |                                             | Yes <input type="checkbox"/> |
|                                    | Q4 part 8<br><i>Leak all the time</i>    |                                             |                                             |                                             |                                             |                               |                                             | Yes <input type="checkbox"/> |
| Bladder diary*                     | 24 hour fluid intake                     | 2L or more <input type="checkbox"/>         |                                             |                                             |                                             |                               |                                             |                              |
|                                    | No. of caffeine & alcoholic drinks daily | More than 2 drinks <input type="checkbox"/> |                                             |                                             |                                             |                               |                                             |                              |
|                                    | No. times passes urine in the day        | 8 or more times <input type="checkbox"/>    |                                             |                                             |                                             |                               |                                             |                              |
|                                    | No. times passes urine at night          | 1 or more times <input type="checkbox"/>    |                                             |                                             |                                             |                               | 1 or more times <input type="checkbox"/>    |                              |
|                                    | Sensation score                          |                                             | Score of 4 <input type="checkbox"/>         | Score of 3-4 <input type="checkbox"/>       |                                             |                               |                                             |                              |

\* the "worst" complete 24 hour given, "Day"= between waking and sleeping, "Night"= between sleeping and waking

Participant ID \_\_\_\_\_
